# Supplementary material for: O-Methylation steps during strobilurin and bolineol biosynthesis
Source: PubMed Central journal article supplement — RSC Adv. 2019 Oct 4;9(54):31527–31. doi: 10.1039/c9ra06412e (PMC9088554; doi:10.1039/c9ra06412e), 2019-10-04
Supplement: RA-009-C9RA06412E-s001.pdf [file RA-009-C9RA06412E-s001.pdf]

## **O-Methylation Steps during Strobilurin and Bolineol Biosynthesis**

Karen E. Lebe and Russell J. Cox

Institute for Organic Chemistry and BMWZ

Leibniz Universität Hannover

Schneiderberg 38

30167 Hannover, Germany

### **Electronic Supplementary Information**

|            |                                                                      |          |
|------------|----------------------------------------------------------------------|----------|
| <b>1.0</b> | <b>Sequence alignment for Str2 and Str3</b>                          | <b>2</b> |
| <b>2.0</b> | <b>Cloning procedure for pTYGS-<i>niaD-str2/str3</i></b>             | <b>2</b> |
| <b>3.0</b> | <b>Transformation and selection of <i>A. oryzae</i></b>              | <b>4</b> |
| <b>3.1</b> | <b>Genetic analysis of transformants</b>                             | <b>4</b> |
| <b>3.2</b> | <b><i>A. oryzae</i> Fermentation and Extraction Procedures</b>       | <b>5</b> |
| <b>4.0</b> | <b>Phenotype and LCMS traces of Expt 3</b>                           | <b>5</b> |
| <b>4.1</b> | <b>Toxicity test with compound 10 against <i>A. oryzae</i> NSAR1</b> | <b>6</b> |
| <b>5.0</b> | <b>5.0 uv Absorbtion data of compounds 10 and 13</b>                 | <b>6</b> |
| <b>6.0</b> | <b>Toxicity test with bolineol against <i>A. oryzae</i> NSAR1</b>    | <b>7</b> |
| <b>7.0</b> | <b>References</b>                                                    | <b>7</b> |

## 1.0 Sequence alignment for Str2 and Str3

```

Str2      MAAESAKQTPYVLVADEVEWARLDAMHNGIAKFLGNELTPVDLGGPKKILEIGAGSGAWA        60
Str3      -MSSPAAQT PYALVPTDAEWEWERLDAQHNGIAKFLDHLKLPVDLGGPKKILEIGSGSGAWA    59
      :. * ****.* * :.* * * * * * * * * * * * * * * * * * * * * * * * * * * * *
Str2      IQAAKLYPDADVLAIDMNP I PARPLPPNRYQINLVLEPPFEAASFVDVIHRLVLCHLP        120
Str3      IQAAKLPDADVLAIDVNPLPARPLPSNIRFQQ LNVLEPPFPFPGSFDIVHIRFVLCHLP      119
      ***** :*****: * ** :***** *: *: * :***** . * * *: * * :*****
Str2      DGHSVLKRIIDLVPGGWLLIIDIDWAEAFEGLDKAPGIKRGLTALVRSMEAEAGDPHYG        180
Str3      NGYTVLPRI IELVAPGGWLLVDDIDFLHAFEGLDKAPGVKSGFTGLIKSMESHADDPHFG      179
      : * : * * * : * * * * * * * * * * * * * * * * * * * * * * * * * * * * *
Str2      KTLKPYLEASKELSEVHVREVELPVNPIPEDPALAGLSQMMRKALVGAALGAALKSS---A      237
Str3      KTLKGLLESSESSALSEVNVQKVELPINPTPEXPALGPLSRTMRQAFSNAVGAEKLNPDVT      239
      * * * * * * * * * * * * * * * * * * * * * * * * * * * * * * * * *
Str2      TVGLTKEVQEGFLSEMAREMDWSYSCYL YFAAVKSA 275
Str3      KGGLTREVQQAF L NEMGGDAQDWSYSVHLYFWSQKRV 277
      . * * * : * * * * * * * * * * * * * * * * * * * * * * * * * *

```

**Figure S1:** CLUSTAL O(1.2.4) multiple sequence alignment.<sup>1</sup> SAM binding site marked in yellow, identical residue (\*), conserved substitutions (:), semi-conserved substitutions (.).

## 2.0 Cloning procedure for pTYGS-*niaD-str2/str3*

The expression plasmids pTYGS-*niaD-str2/str3* for transformation were constructed using restriction enzyme *AscI* to cut in between the three promoter/terminator pairs ( $P/T_{adh}$ ,  $P/T_{gpdA}$ ,  $P/T_{eno}$ ) in order to simultaneously add three DNA fragments (genes and plugs) by yeast homologous recombination (Figure S2). The genes *str2* and *str3* were amplified from a previous reported plasmid pTYGS-*niaD-str2-str3*.<sup>2</sup> Plugs to repair the cut vector were amplified from the empty pTYGS<sub>niaD</sub> expression plasmid. Oligonucleotides used for polymerase chain reaction are summarised in table S2.

Preparation of *S. cerevisiae* competent cells was done using the LiOAc/SS carrier DNA/PEG protocol developed by Gietz and Woods.<sup>3</sup> For each transformation competent yeast cells were freshly prepared. A single colony was inoculated into 10 ml of YPAD medium and grown overnight at 30 °C, 200 rpm. The seed culture was added to 40 ml of YPAD in a 250 ml flask and incubated at 30 °C, 200 rpm, for 4–5 h. Cells were harvested by centrifugation for 5 min at 3000 x g. After washing with 25 ml water the cell pellet was resuspended in 1 ml water and transferred to a 1.5 ml tube. The cells were pelleted at 20000 x g for 15 s, the supernatant discarded and cells resuspended in 400  $\mu$ l water. Afterwards the suspension was aliquoted (100  $\mu$ l into 1.5 ml tubes each).

For yeast recombination-based cloning using *S. cerevisiae*, competent cell aliquots were pelleted 20000 x g for 15 s and the supernatant discarded, following addition of 250  $\mu$ l PEG solution, 36  $\mu$ l 1 M LiOAc, 50  $\mu$ l ssDNA (2 mg/ml) and up to 34  $\mu$ l of DNA was added to the pelleted cells. Cells were resuspended in the transformation mixture by careful pipetting. The mixture was incubated at 30 °C for 50 min and afterwards cells were pelleted at 3000 x g for 15 s. The cell pellet was gently resuspended in 1 ml water before 200  $\mu$ l of the mixture was spread over SM-URA plates and incubated at 30 °C for 3 to 4 days.

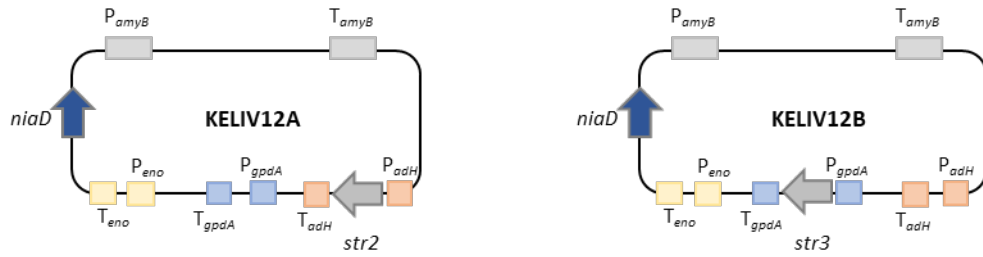

**Figure S2:** Plasmid maps of constructed plasmids: KELIV12A, pTYGS-*niaD-str2* and KELIV12B, pTYGS-*niaD-str3*.

**Table S1:** Oligonucleotide sequences for construction of expression plasmids KELIV12A and KELIV12B

| Primer name | 5'-3' sequence                                      |
|-------------|-----------------------------------------------------|
| Str2_F      | TTTCTTTCAACACAAGATCCCAAAGTCAAAATGTCTTCTCCTGCTGCTCA  |
| Str2_R      | TTCATTCTATGCGTTATGAACATGTTCCCTTTAGACACGCTTCTGCGACC  |
| Str3_F      | TAAACAGCTACCCCGCTTGAGCAGACATCACATGGCCGCCGAATCTGCTAA |
| Str3_R      | ACGACAATGCCATATCATCAATCATGACCTTAGGCACTCTTCTTCACCG   |
| Plug gpdA_F | CTTTTCTTTTCTCTTTCTTTTCCCATCTTC                      |
| Plug gpdA_R | TGACCTCCTAAAACCCAGTG                                |
| Plug enO_F  | CTTCTTAAATATCGTTGTAAGTTCCTGA                        |
| Plug enO_R  | CGAAGTATATTGGGAGACTATAGCTACTAG                      |
| Plug adH_F  | ATTCACCACTATTATCCACCCTATAATA                        |
| Plug adH_R  | GAGACGAAACAGACTTTTTCATCGCTAAAA                      |

### 3.0 Transformation and Selection of *A. oryzae*.

#### 3.1 Genetic analysis of *A. oryzae* transformants

The genomic DNA of *A. oryzae* transformants was isolated and the correct integration of genes of interest into the genome was tested by PCR using the specific oligonucleotides for each gene (Figure S3, Table S3).

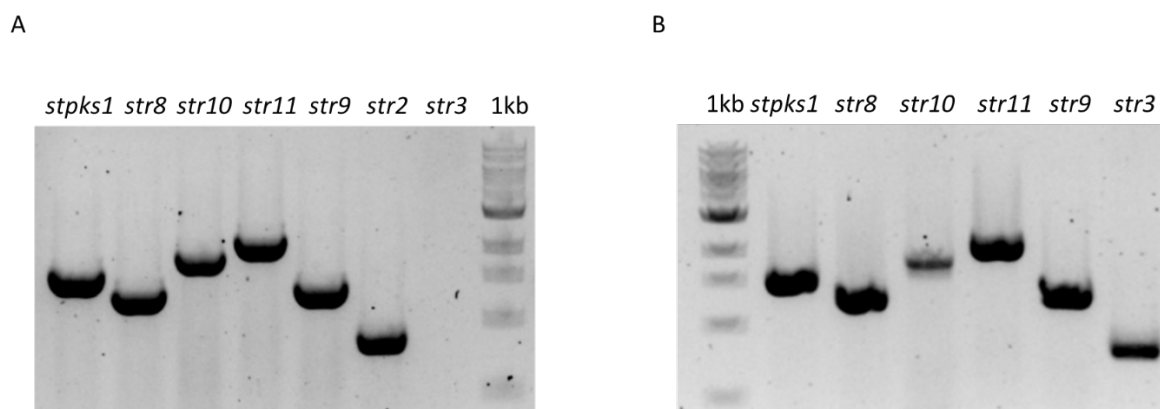

**Figure S3:** Genetic analysis of transformant *A. oryzae* NSAR1 + *stPKS1* + *str11* + *str8* + *str10* + *str9* + *str2* (A), and transformant NSAR1 + *stPKS1* + *str11* + *str8* + *str10* + *str9* + *str3* (B); Oligonucleotides used are summarised in table S3.

**Table S3:** Oligonucleotide sequences for genetic analysis

| Primer name | 5'-3' sequence         |
|-------------|------------------------|
| Str11_F     | ATGCCATACCCGTCTGACTTG  |
| Str11_R     | CAAGCAAATAGTCCAACGACA  |
| Str8_F      | ATGATCGTGATGTCTCGCCTG  |
| Str8_R      | CTATCGCAGCATCCTCCCTCT  |
| Str10_F     | ATGACCATCCTCCGTTCTCGC  |
| Str10_R     | ATTGTCTACGATCGGTGCGCGC |
| str9_F      | ATGGCCGTTGATCGCAAGA    |
| str9_R      | CTAGACAAGGCGTTCCTCA    |
| stPKS1_F    | ATGTCACCTACTGCTGAAAT   |
| stPKS1_R    | GAATACGAATGGACCATCAG   |
| 1105_str2_F | ATGTCTTCTCCTGCTGCTCA   |
| 1106_str2_R | TTAGACACGCTTCTGCGACC   |
| 1107_str3_F | ATGGCCGCCGAATCTGCTAA   |
| 1108_str3_R | TTAGGCACTTCTTACCG      |

### 3.2 A. oryzae Fermentation and Extraction Procedures

*Aspergillus oryzae* NSARI transformants were grown on DPY agar plates for 7 days at 28 °C. The mycelium from the plate was used to inoculate the liquid culture (100 ml DPY medium in 500 ml flasks). For LCMS analysis the cultures were grown for 7 days at 28 °C and 120 rpm prior to extraction.

**DPY (agar):** 2.00%(w/v) dextrin from potato starch, 1.00%(w/v) polypeptone, 0.50 monopotassium phosphate, 0.50%(w/v) yeast extract, 0.05%(w/v) MgSO<sub>4</sub> x H<sub>2</sub>O, (2.50%(w/v) agar)

*A. oryzae* cultures were clarified by Büchner filtration, the supernatant acidified to pH 2 with 2 M HCl and extracted twice with an equal amount of ethyl acetate. Combined organic layers were dried over MgSO<sub>4</sub> and solvent removed under vacuum. Extracts were dissolved in methanol to a concentration of 10 mg/ml, filtered over glass wool and directly analysed or purified by LCMS.

### 4.0 Phenotype and LCMS traces of Expt 3

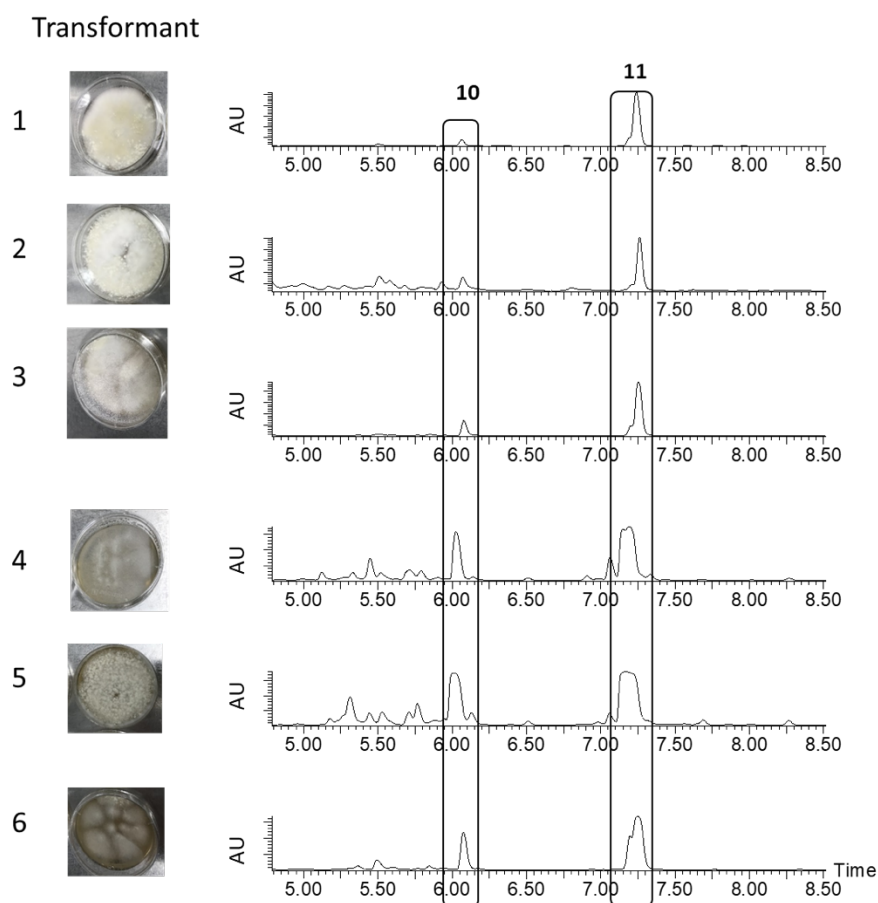

**Figure S4:** Phenotype and LCMS (DAD) traces of NSARI *stPKS1 + str11 + str8 + str10 + str9 + str3* transformants 1-6.

#### 4.1 Toxicity test with compound 10 against *A. oryzae* NSAR1

Toxicity test were carried out on small agar plates filled with 5 ml DPY agar supplemented with different concentrations of compound 10 (0.5, 1, 2, 5 mg). Compound 10 was diluted in 200  $\mu$ l DMSO prior to addition to the liquid DPY agar. Control plates were supplemented with 200  $\mu$ l DMSO only. *A. oryzae* NSAR1 spores were streaked on the plates on day 1.

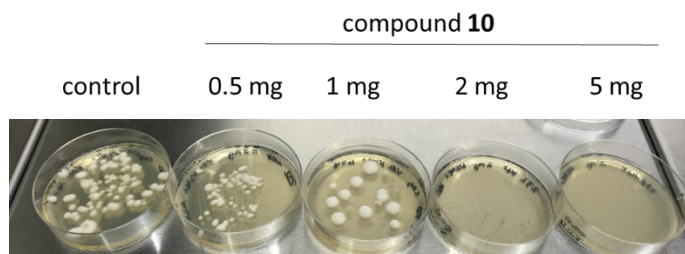

**Figure S5:** Toxicity test with compound 10 against *A. oryzae* NSAR1. DPY agar (5ml) was supplemented with various concentrations (0.5, 1, 2, 5 mg) of compound 10 diluted in 200  $\mu$ l DMSO, control only 200  $\mu$ l DMSO.

#### 5.0 uv Absorbtion data of compounds 10 and 13

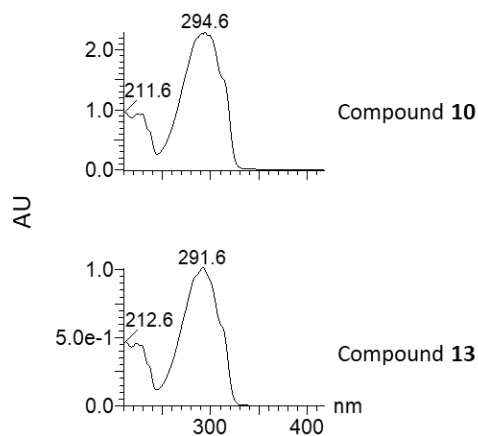

**Figure S6:** UV spectra of compound 13 in comparison with compound 10. See main text Figure 2 for MS data.

## 6.0 Toxicity test with bolineol 4 against *A. oryzae* NSAR1

Toxicity test were carried out on small agar plates filled with 5 ml DPY agar supplemented with different concentrations of bolineol 4 (0.1, 0.2, 0.3, 0.5, 1.0, 2.0 mg). Bolineol was diluted in 200  $\mu$ l DMSO prior to addition to the liquid DPY agar. Control plates were supplemented with 200  $\mu$ l DMSO only. *A. oryzae* NSAR1 spores were streaked on the plates on day 1.

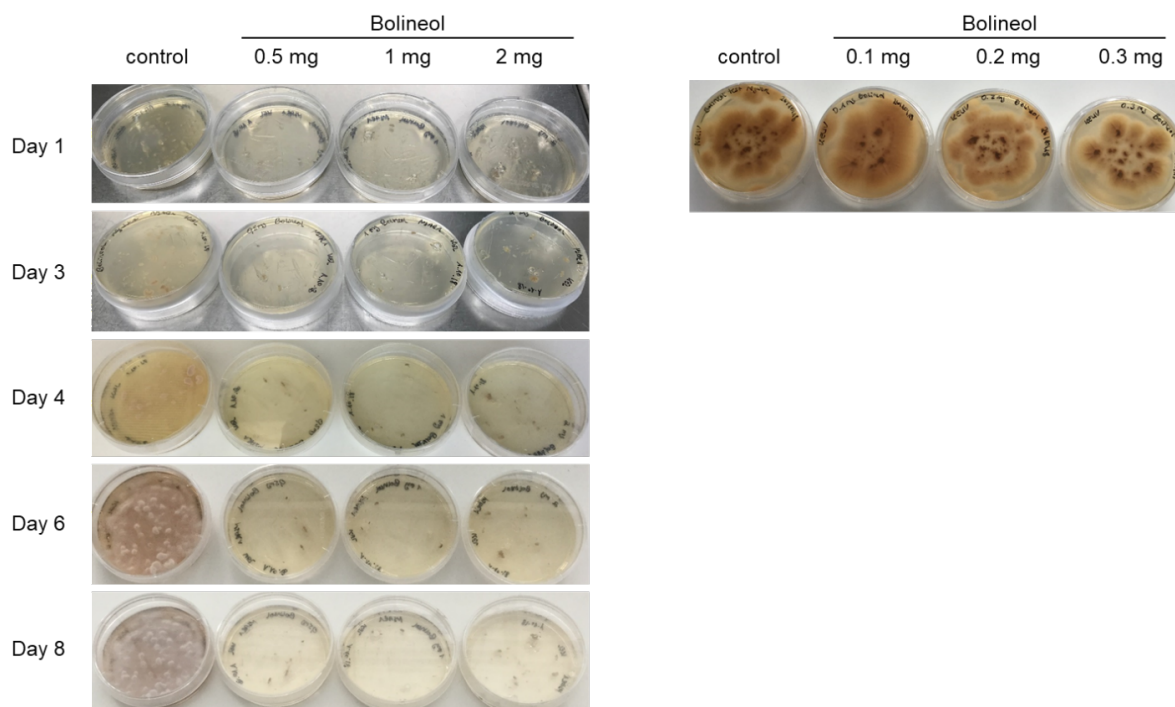

**Figure S7:** Toxicity test with bolineol 4 against *A. oryzae* NSAR1. DPY agar (5ml) was supplemented with various concentrations (0.1, 0.2, 0.3, 0.5, 1.0, 2.0 mg) of compound 4 diluted in 200  $\mu$ l DMSO, control only 200  $\mu$ l DMSO.

## 7.0 References

1. F. Sievers, A. Wilm, D. Dineen, T. J. Gibson, K. Karplus, W. Li, R. Lopez, H. McWilliam, M. Remmert, J. Söding, J. D. Thompson, D. G. Higgins, *Mol Syst Biol.*, 2011, **7**, 539.
2. R. Nofiani, K. de Mattos-Shipley, K. E. Lebe, L.-C. Han, Z. Iqbal, A. M. Bailey, C. L. Willis, T. J. Simpson & R. J. Cox, *Nat. Commun.*, 2018, **9**, 3940.
3. Gietz, R. D.; Woods, R. A. *Methods Enzymol.* 2002, **350**, 87–96.
